# Supplementary material for: Hydrothermal epitaxy growth of self-organized vanadium dioxide 3D structures with metal–insulator transition and THz transmission switch properties
Source: Royal Society of Chemistry journal article supplement (doi:10.1039/c9ce01894h), 2020-01-01
Supplement: c9ce01894h1.pdf [file c9ce01894h1.pdf]

## Electronic Supporting Information

### Hydrothermal epitaxy growth of self-organized vanadium dioxide 3D structures with metal-insulator transition and THz transmission switch properties

A. Makarevich<sup>a,d,†</sup>, O. Makarevich<sup>a</sup>, A. Ivanov<sup>b</sup>, D. Sharovarov<sup>b</sup>, A. Eliseev<sup>b</sup>, V. Amelichev<sup>d</sup>, O. Boytsova<sup>a,b,c,§</sup>, A. Gorodetsky<sup>e,f</sup>, M. Navarro-Cía<sup>f</sup>, A. Kaul<sup>a</sup>

<sup>a</sup> Department of Chemistry, Lomonosov Moscow State University, Moscow, 119991, Russia.

<sup>b</sup> Department of Material Science, Lomonosov Moscow State University, Moscow, 119991, Russia.

<sup>c</sup> Kurnakov Institute of General and Inorganic Chemistry RAS, Moscow, 119991, Russia.

<sup>d</sup> SuperOx, 20/2 Nauchnyi proezd, Moscow, 117246, Russia.

<sup>e</sup> ITMO University, St. Petersburg 197101, Russia

<sup>f</sup> School of Physics and Astronomy, University of Birmingham, B15 2TT, Birmingham, UK.

<sup>†</sup> makarevich@inorg.chem.msu.ru

<sup>§</sup> boytsova@gmail.com

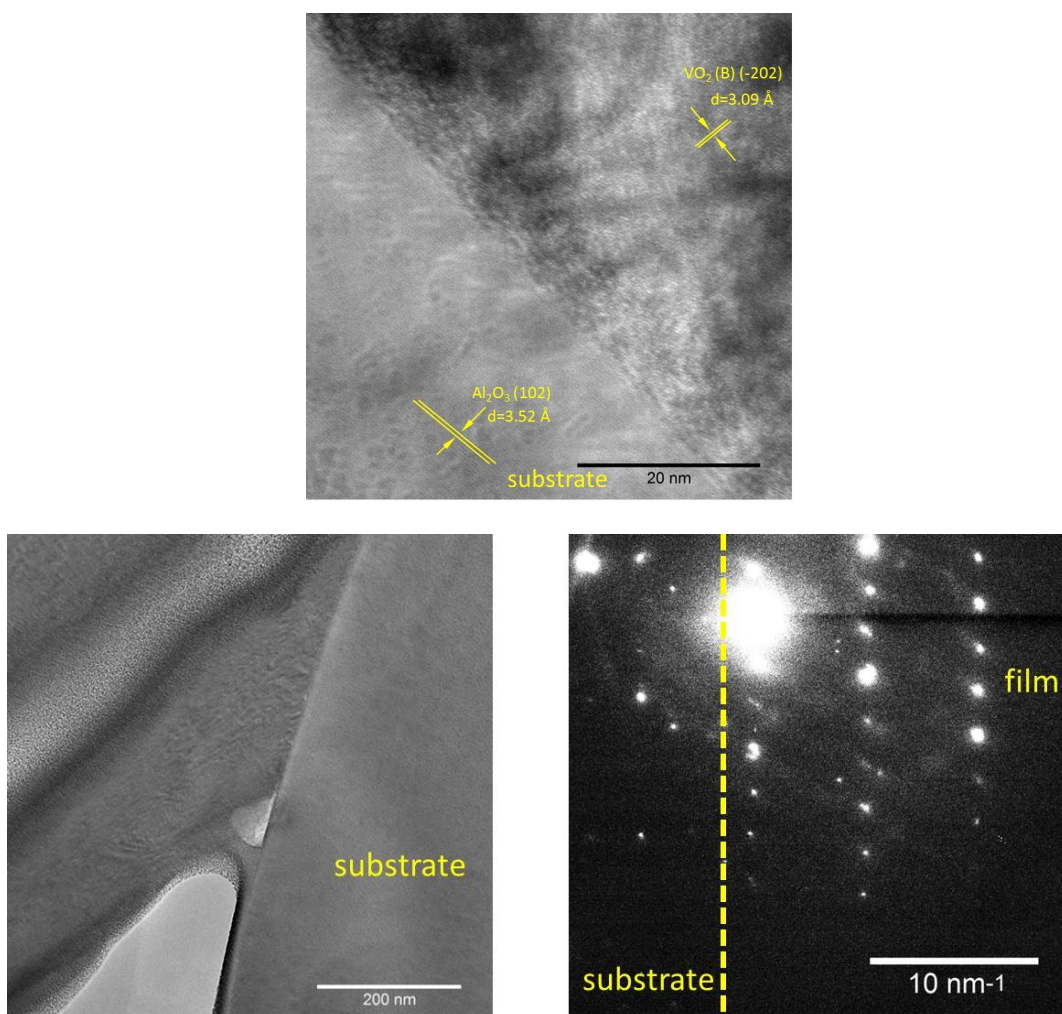

Figure S1. HRTEM, TEM and related SAED Images of  $\text{VO}_2(\text{B})$  film on R-sapphire substrate (Epitaxial relations for  $\text{VO}_2(\text{B})$   $(-202)_f \perp (01-12)_s$ , s-substrate, f-film ). Cross section of sample were realized perpendicularly to substrate and along the axis of carambola-growth

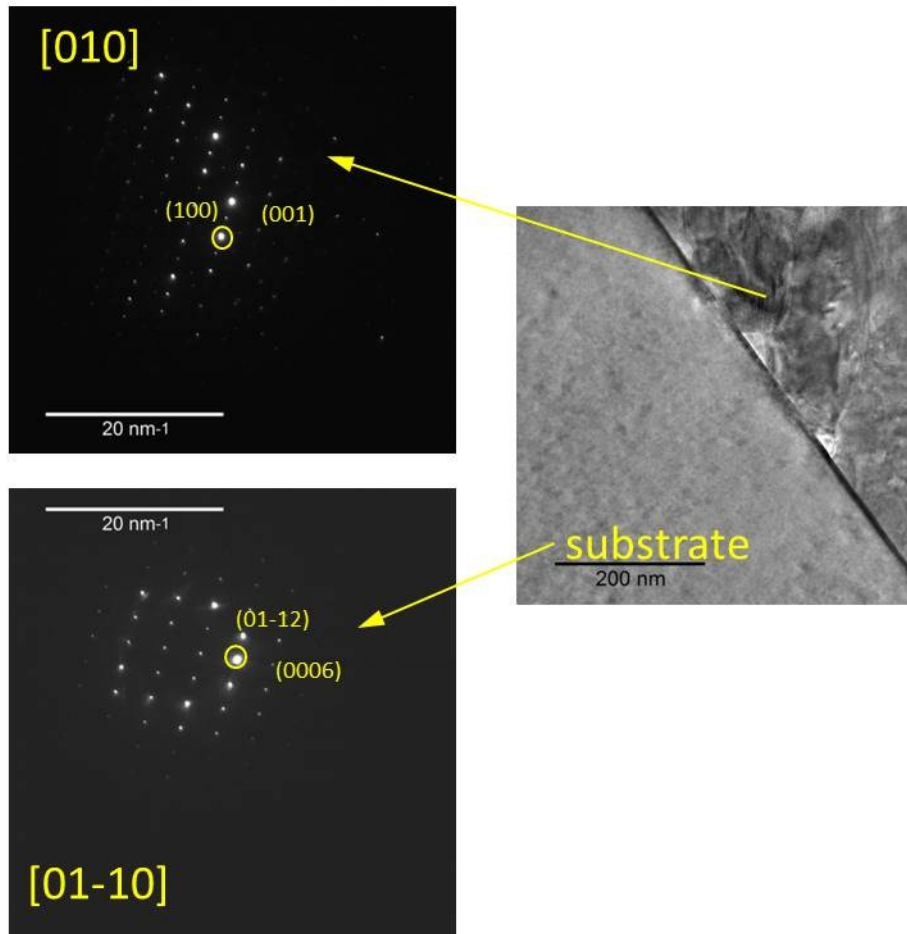

Figure S2. SAED Patterns and TEM Image of  $\text{VO}_2(\text{M})$  film on R-sapphire substrate (Epitaxial relations for  $\text{VO}_2(\text{M})$   $(001)_f \parallel (0001)_s$ ,  $(100)_f \parallel (01-12)_s$ ,  $[010]_f \parallel [01-10]_s$ ).

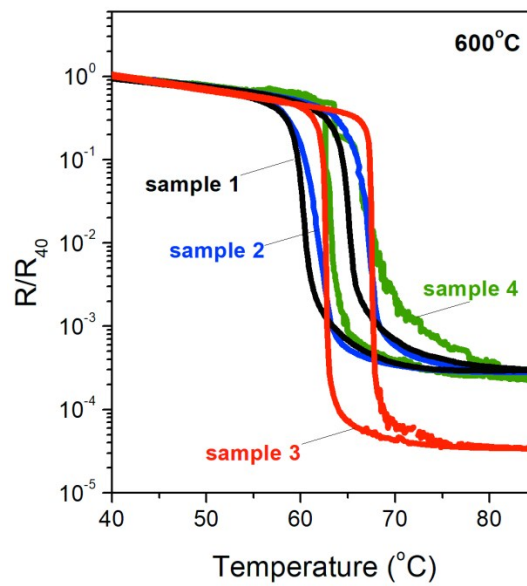

Figure S3. The electrical properties of all samples annealed at  $600^\circ\text{C}$ .
